# Supplementary material for: Modeling study of the snow darkening effect by black carbon deposition over the Arctic during the melting period
Source: Copernicus journal article supplement (doi:10.5194/egusphere-2024-1717), 2024-06-24
Supplement: Supplementary file 1 [file egusphere-2024-1717-supplement.pdf]

# Supplement of Comparison of on-line and off-line simulation for impacts of Snow-Darkening by Black Carbon deposition on the Arctic

Zilu Zhang<sup>1,2</sup>, Libo Zhou<sup>1,2,3\*</sup>, Meigen Zhang<sup>2,3\*</sup>

5 <sup>1</sup> Department of Lower Atmosphere Observation Research (LAOR), Institute of Atmospheric Physics, Chinese Academy of Sciences, Beijing, China

<sup>2</sup> College of Earth and Planetary Science, University of Chinese Academy of Sciences, Beijing, China

<sup>3</sup> State Key Laboratory of Atmospheric Boundary Layer Physics and Atmospheric Chemistry, Institute of Atmospheric Physics, Chinese Academy of Sciences, Beijing, China

10

Correspondence to: Libo Zhou ([zhoulibo@mail.iap.ac.cn](mailto:zhoulibo@mail.iap.ac.cn)); Meigen Zhang ([mgzhang@mail.iap.ac.cn](mailto:mgzhang@mail.iap.ac.cn))

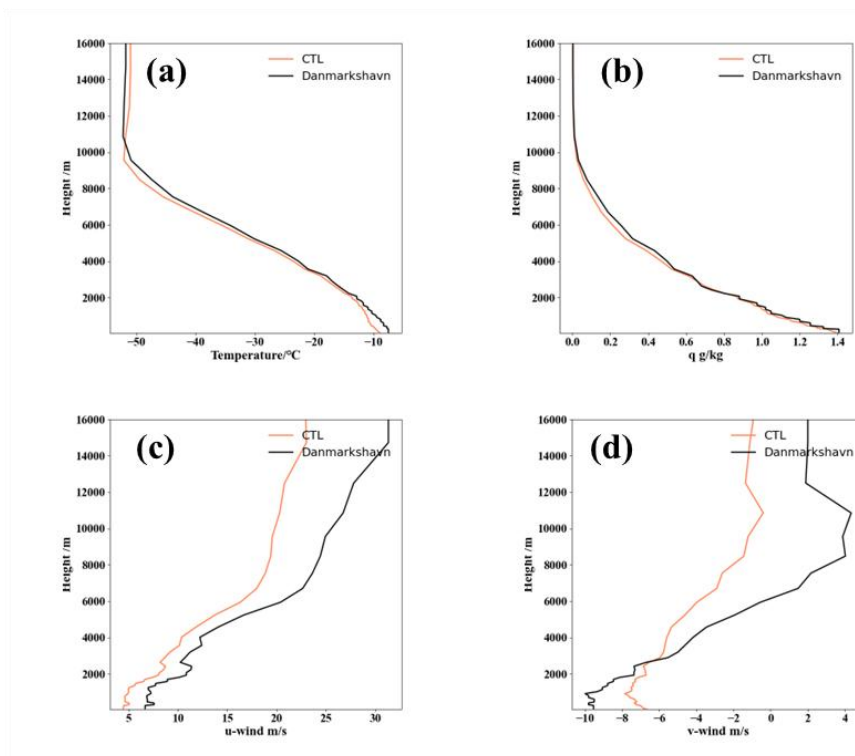

15 **Figure S1.** Vertical profiles of simulated (in orange lines) and observed (in black lines) (a) temperature ( $^{\circ}\text{C}$ ), (b) specific humidity ( $\text{g kg}^{-1}$ ), (c) u-wind speed ( $\text{m s}^{-1}$ ) and (d) v-wind speed ( $\text{m s}^{-1}$ ) at the Danmarkshavn station at 00:00 and 12:00 (UTC) averaged from 15 April to 15 May 2020.

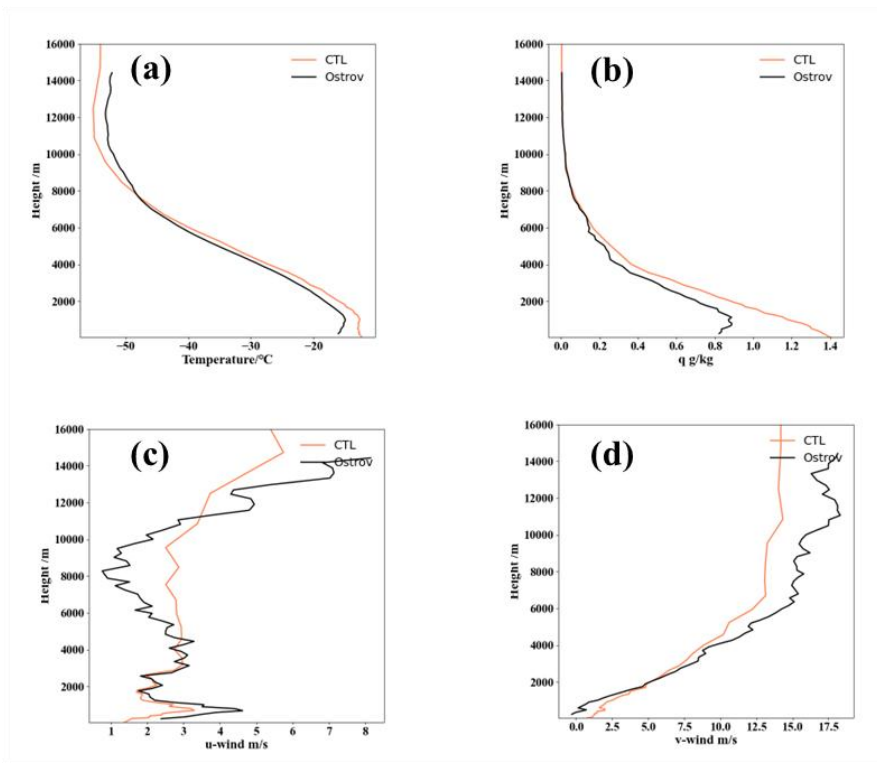

20 Figure S2. Vertical profiles of simulated (in orange lines) and observed (in black lines) (a) temperature ( $^{\circ}\text{C}$ ), (b) specific humidity ( $\text{g kg}^{-1}$ ), (c) u-wind speed ( $\text{m s}^{-1}$ ) and (d) v-wind speed ( $\text{m s}^{-1}$ ) at the Ostrov station at 00:00 and 12:00 (UTC) averaged from 15 April to 15 May 2020.

Table S1. Statistics for observed and simulated meteorological fields (T2, RH2, WS10 and WD10) from 15 April to 15 May 2020 at Barrow and Summit stations.

|                            | Barrow |      |      | Summit |      |      |
|----------------------------|--------|------|------|--------|------|------|
|                            | MB     | R    | RMSE | MB     | R    | RMSE |
| T2 ( $^{\circ}\text{C}$ )  | 2.08   | 0.97 | 2.48 | 2.58   | 0.89 | 4.88 |
| RH2 (%)                    | -2.97  | 0.81 | 5.95 | 0.59   | 0.68 | 6.06 |
| WS10 ( $\text{m s}^{-1}$ ) | -0.23  | 0.81 | 1.65 | -0.87  | 0.93 | 1.71 |
| WD10 ( $^{\circ}$ )        | -5.52  | 0.63 | 80.1 | -27.5  | 0.56 | 57.4 |

25

30 **Table S2. Statistics for observed and simulated surface energy balance (SW, HS, and LH) from 15 April to 15 May 2020 at Alaska.**

|                              | <b>MB</b>    | <b>R</b>    | <b>RMSE</b>  |
|------------------------------|--------------|-------------|--------------|
| <b>SW (W m<sup>-2</sup>)</b> | <b>0.24</b>  | <b>0.88</b> | <b>53.21</b> |
| <b>HS (W m<sup>-2</sup>)</b> | <b>3.12</b>  | <b>0.57</b> | <b>17.39</b> |
| <b>LH (W m<sup>-2</sup>)</b> | <b>-0.96</b> | <b>0.58</b> | <b>3.24</b>  |
